# Supplementary material for: Raising effective awareness for circular economy and sustainability concepts through students' involvement in a virtual enterprise
Source: Frontiers journal article supplement (doi:10.3389/frsus.2023.1060860), 2023-02-01
Supplement: Data_Sheet_1.PDF [file Data_Sheet_1.PDF]

Supplementary material for

## **Raising effective awareness for circular economy and sustainability concepts through students' involvement in a virtual enterprise**

Kiriaki Keramitsoglou<sup>1\*</sup>, Theodoros Litseselidis<sup>1</sup>, Anna Kardimaki<sup>1</sup>

<sup>1</sup>1st Vocational Lyceum of Didimoticho "Evgenios Evgenidis", Leonidou 52-54, 68300, Didimoticho, Greece,

\*[kkeramit@env.duth.gr](mailto:kkeramit@env.duth.gr)

This file includes supplementary photographic material and evidence of the virtual enterprise activities implementation. The content of this supplemental data file consists of ten Figures S1-S10.

Figure S1 consists of a composition of photos of non-marketable, residual and leftover food usable in the production of animal feed.

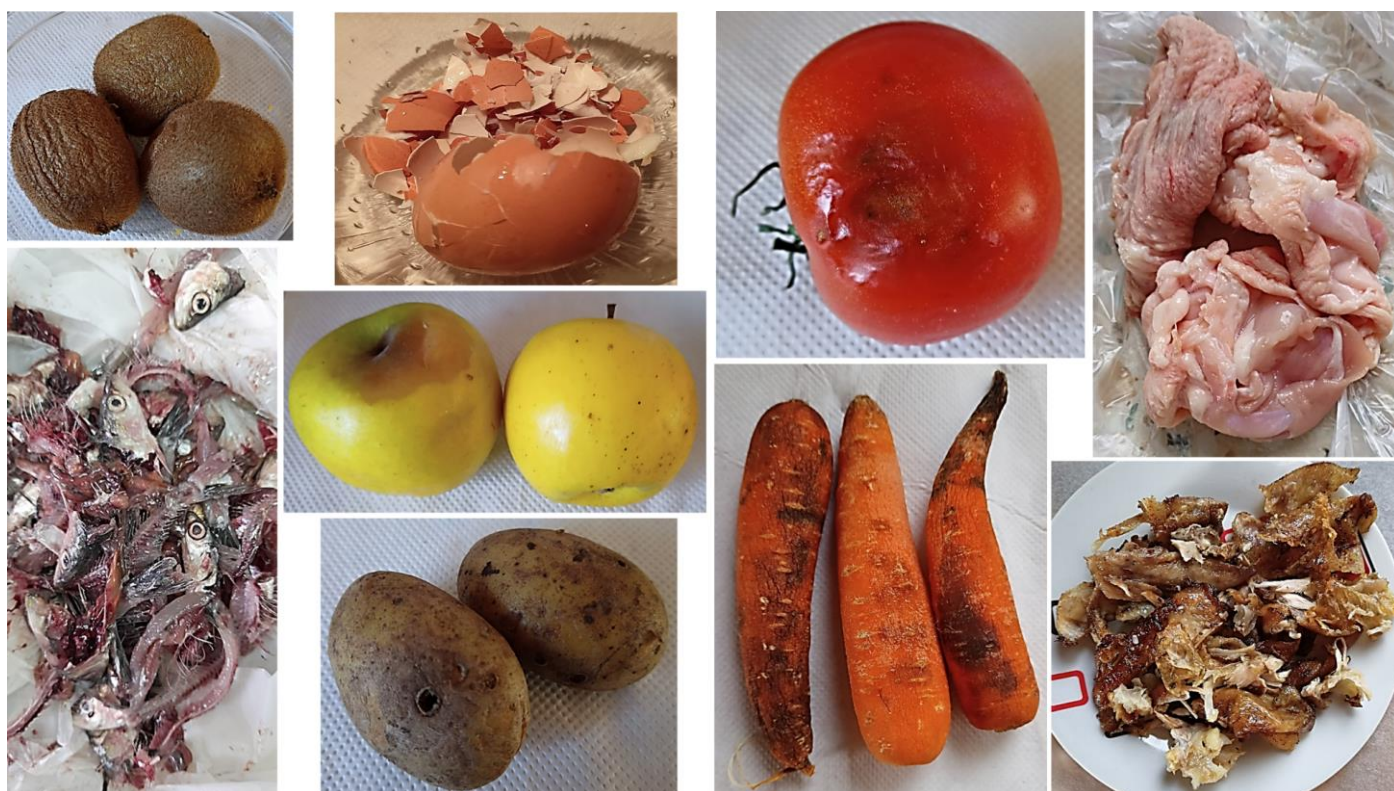

**Figure S1** Samples of non-marketable, residual and leftover food usable in the production of animal feed

Figure S2 presents the organisational chart of the students' enterprise. Every student undertook a role according to his/her individual skills.

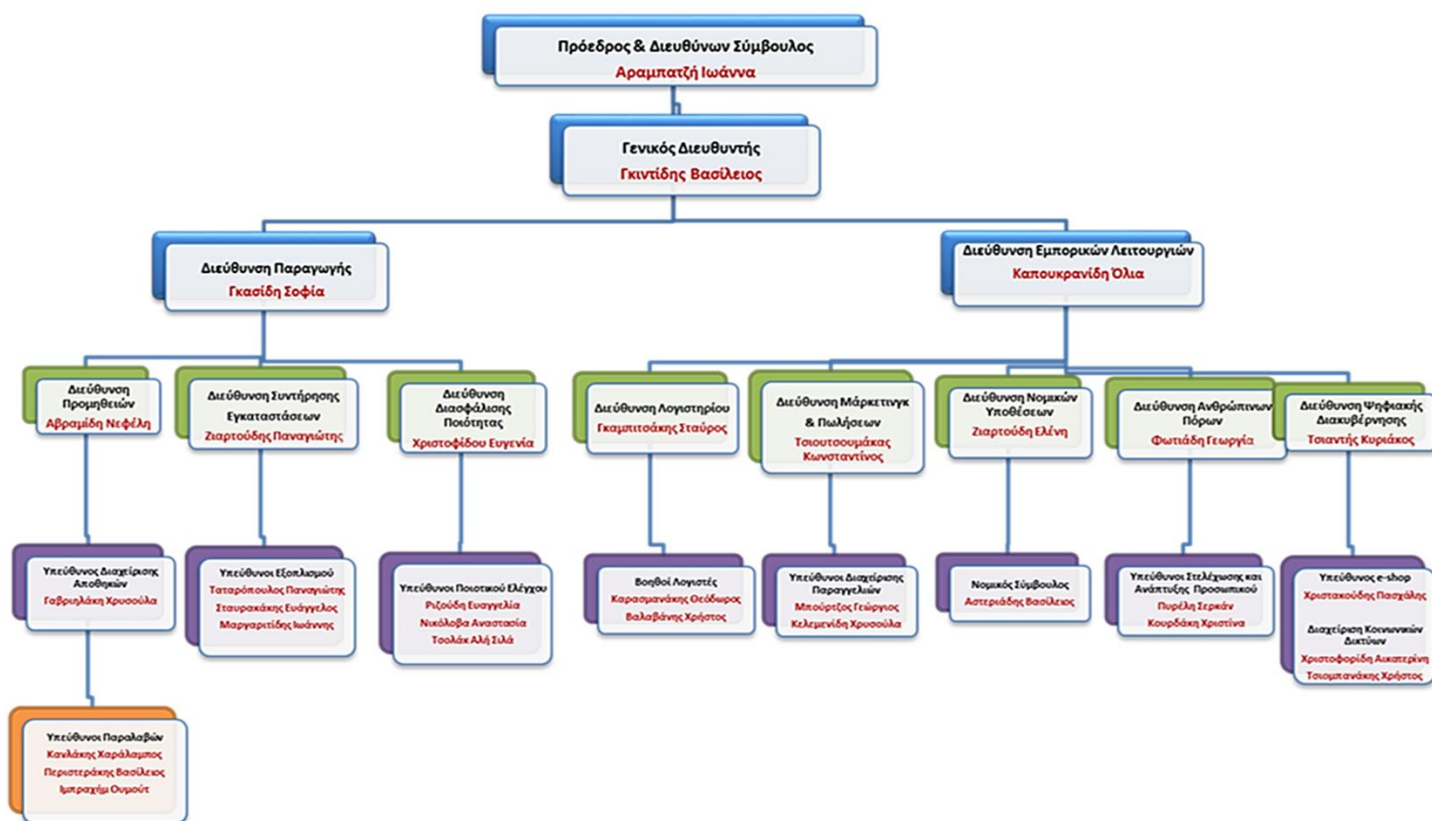

**Figure S2** The organisational chart of the enterprise

Figure S3 presents the share of €1 of the virtual enterprise. One hundred shares of nominal value were issued.



**Ζωομπουκίτσες Έβρου Α.Ε.**  
Έδρα: Διδυμότειχο Έβρου

Μετοχικό Κεφάλαιο: 100 Ευρώ  
Ολοσχερώς Καταβεβλημένα  
Διαιρεμένο σε 100 μετοχές Ονομαστικής Αξίας  
ΕΚΑΣΤΗ: ΕΝΑ (1) Ευρώ

ΤΙΤΛΟΣ ..... ( ) ΜΕΤΟΧΩΝ  
ΟΝΟΜΑΣΤΙΚΗΣ ΑΞΙΑΣ .....Ευρώ

ΑΥΞΩΝ ΑΡΙΘΜΟΣ ΤΙΤΛΟΥ..... ΑΥΞΩΝ ΑΡΙΘΜΟΣ ΜΕΤΟΧΩΝ.....

Κύριος του παρόντος τίτλου είναι ο/η .....  
ο οποίος κατέβαλε το ποσό των ευρώ.....  
Διδυμότειχο ...../...../.....

**Figure S3** The enterprise share

The graphs in Figures S4a, b, c, d, and e describe the socio-economic characteristics of the market survey participants.

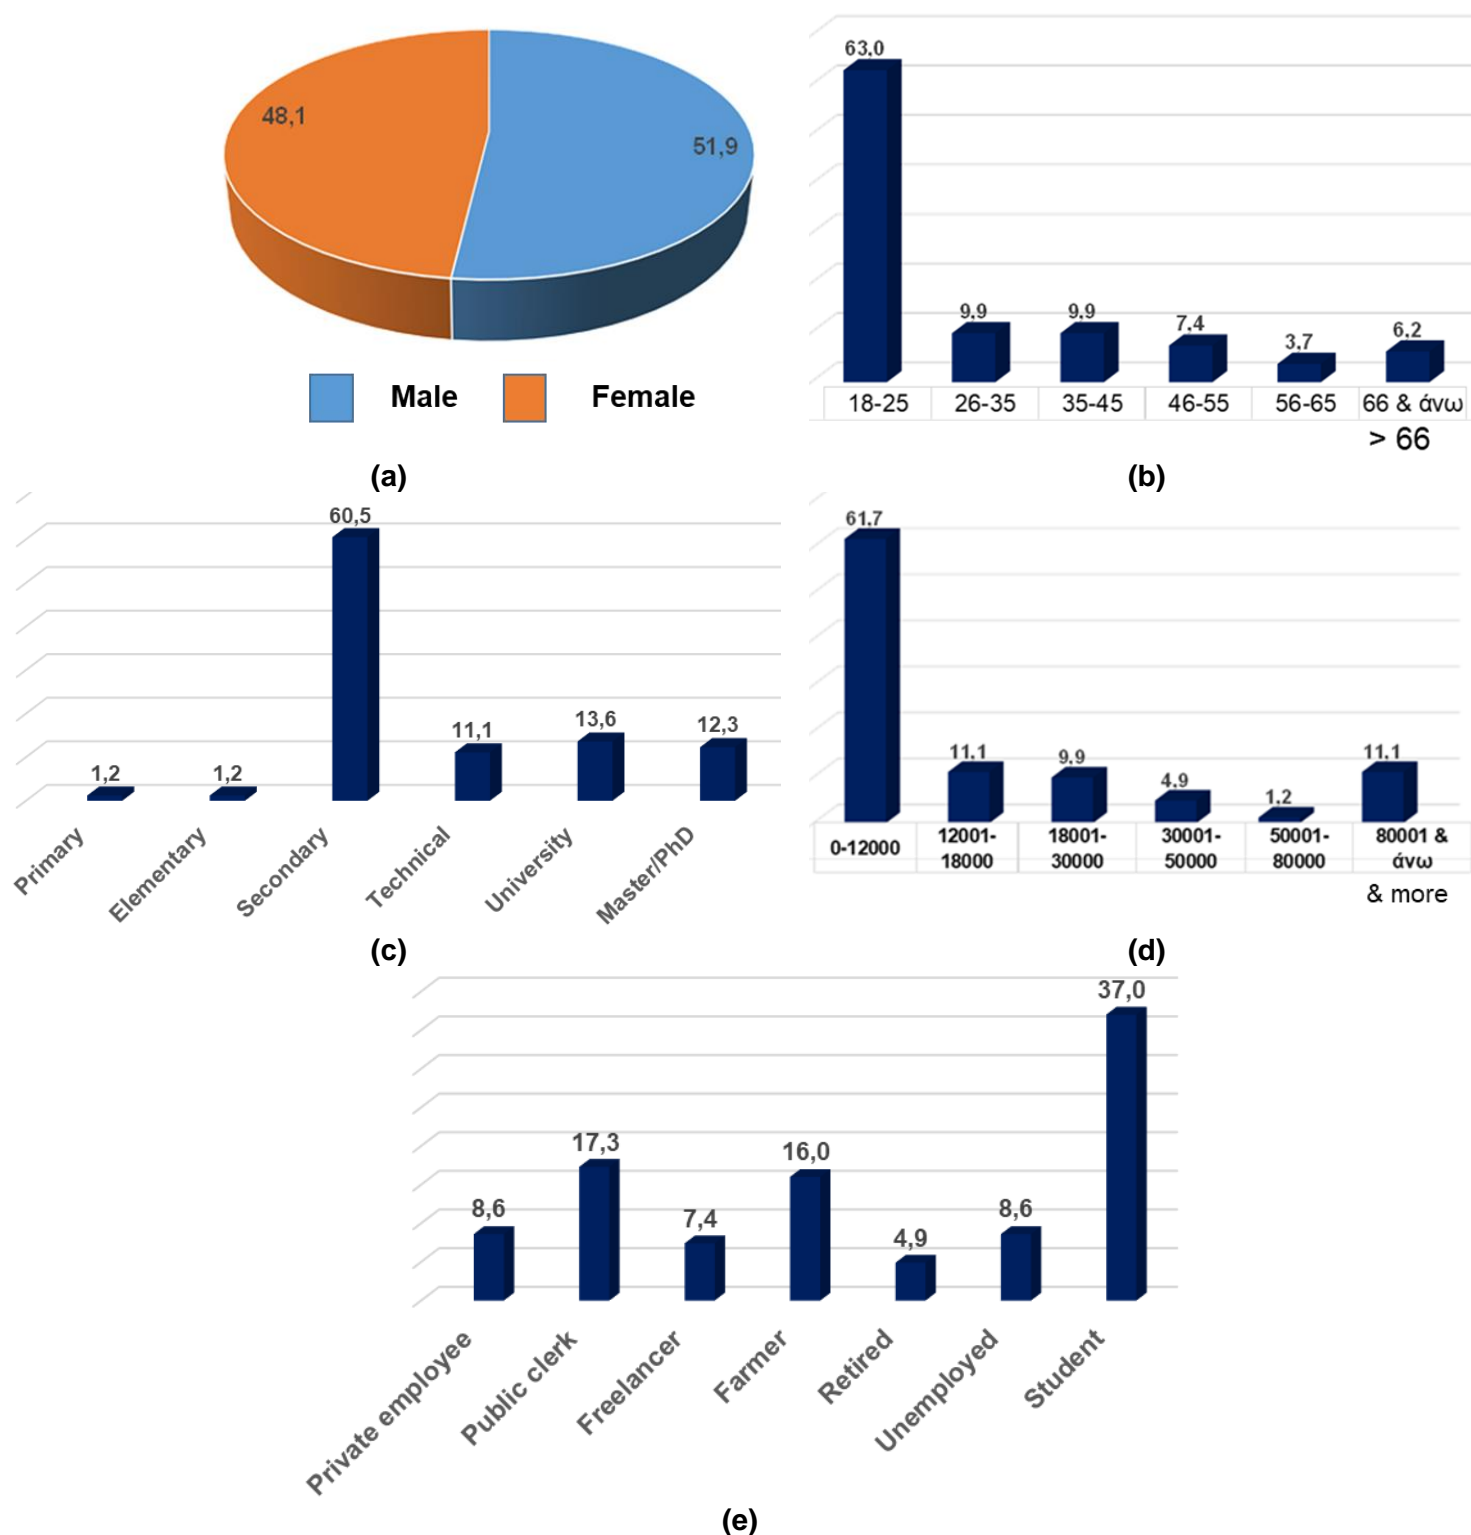

**Figure S4** Graphs for socio-economic characteristics of survey participants in percent ( $N=81$ ) (a) gender (b) age (c) education level (d) annual family income (e) profession, unmarried 71.6% & without children 72.8%

The graphs in Figures S5a, b, c, d, e and f describe the pet ownership and consumption habits of the market survey participants.

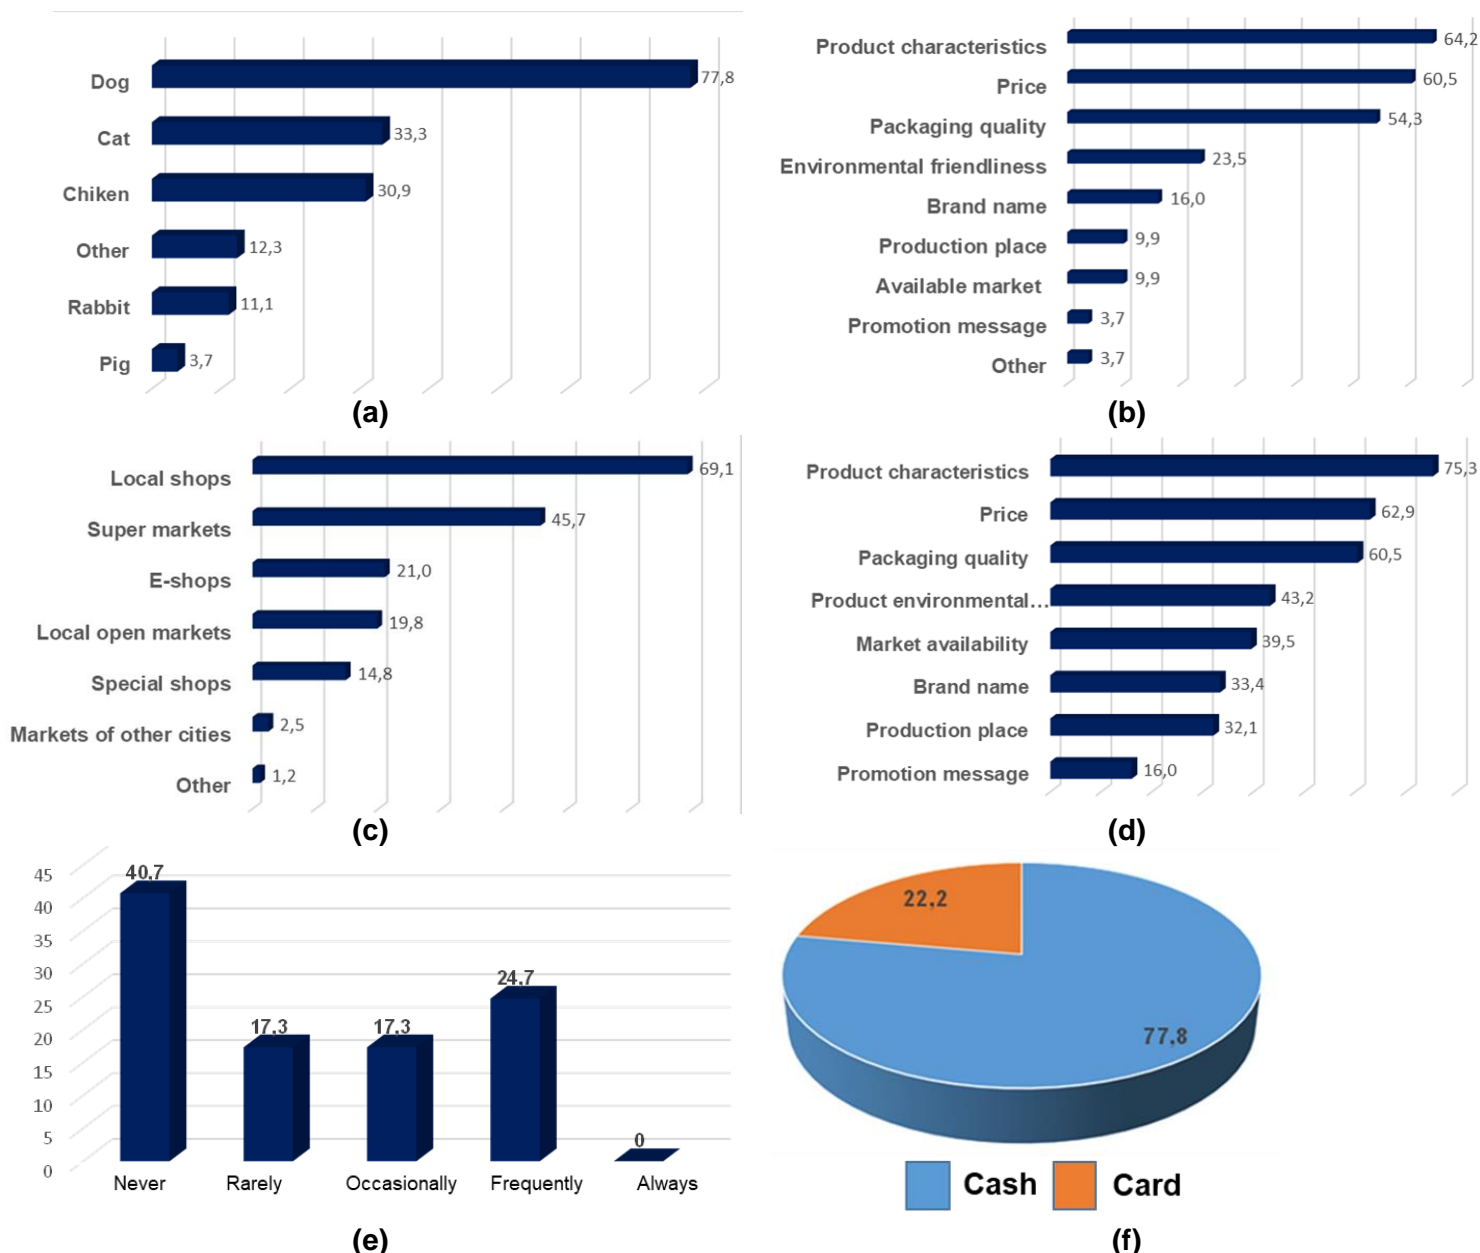

**Figure S5** Graphs for depiction of pet ownership and consumption habits of survey participants in percent ( $N=81$ ) (a) ownership of a pet or domestic animal (b) feed selection criteria (c) selection of feed market (d) range of significance of criteria feed selection (e) frequency of online animal feed purchases (f) payment method

The graphs in Figures S6a, b, c, and d describe the attitudes of the market survey participants.

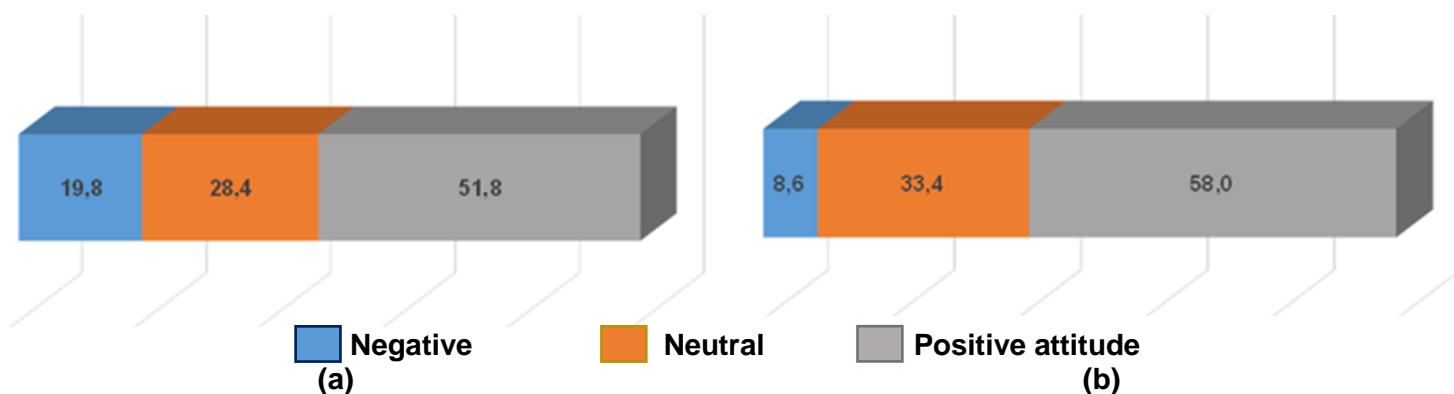



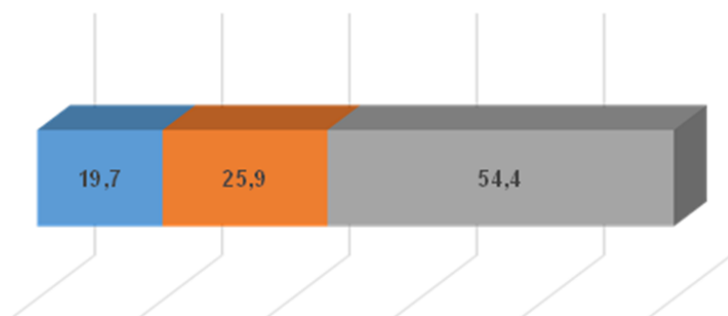

(c)

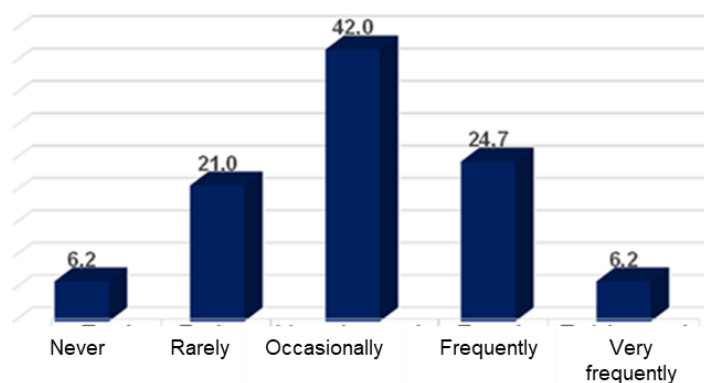

(d)

**Figure S6** Graphs for depicting the attitudes of survey participants in percent ( $N=81$ ) (a) towards environmental friendliness of the product (b) their willingness to change consuming habits (c) their willingness to purchase innovative products against industrial ones (d) frequency of participation in actions for an environmentally friendly lifestyle

Figure S7 consists of a composition of photos of production process.

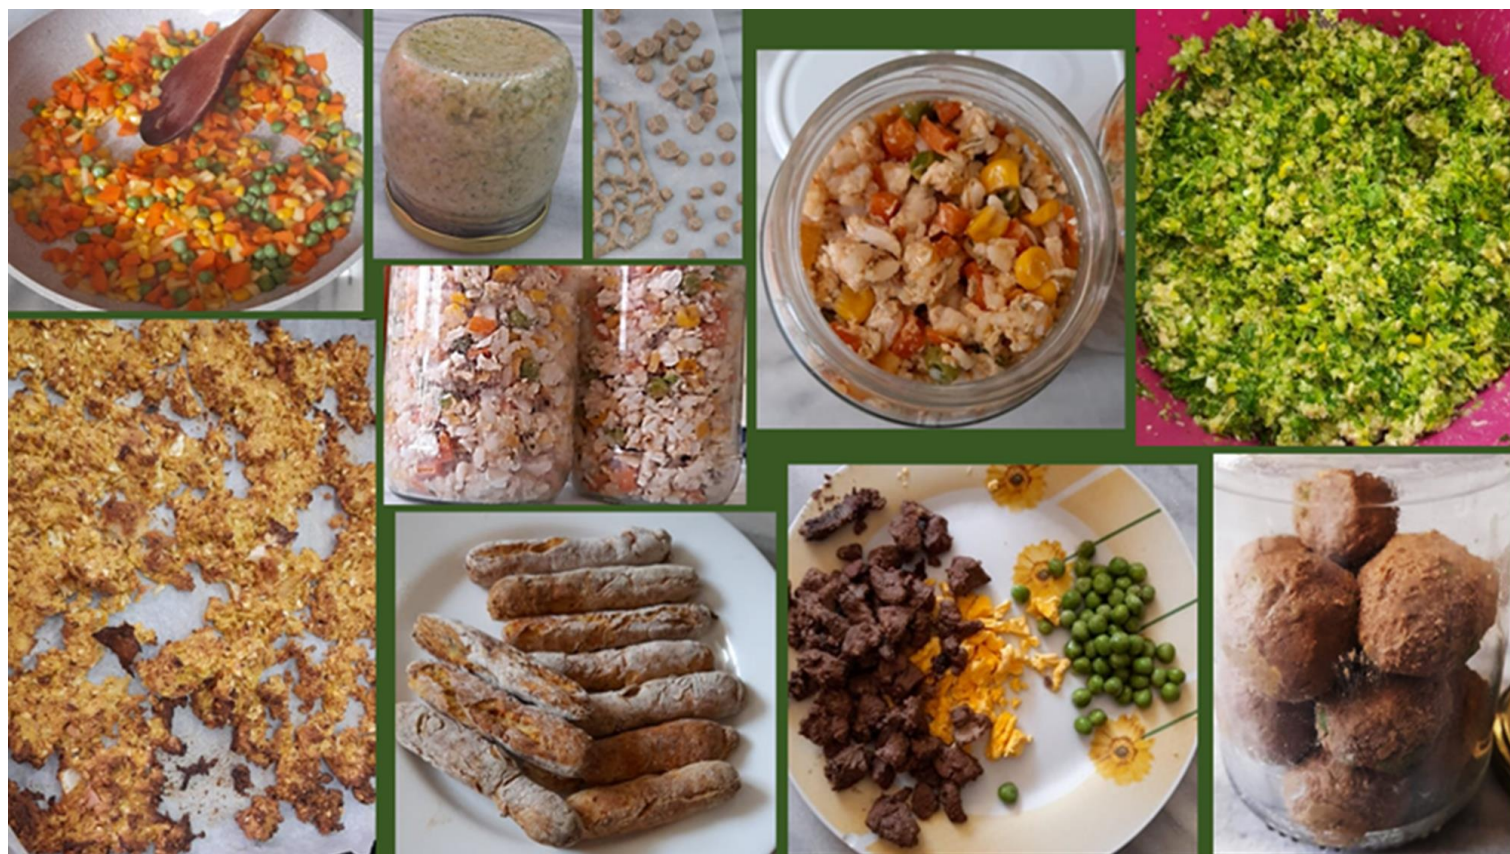

**Figure S7** Production process

Figure S8 presents a sample of the products labels.

**Λιχουδιές Κεράσματα για σκύλους**

BAKED | 100% φυσικά προϊόντα  
FRESH | υποαλλεργικό σνακ

Ημερομηνία παραγωγής: Καθαρό βάρος:

Το προϊόν διατηρείται για επτά (7) ημέρες στο ψυγείο από την ημερομηνία παραγωγής. Καταναλώνεται εντός τριών (3) ημερών από το άνοιγμα της συσκευασίας.

**Λιχουδιές Κεράσματα για σκύλους**

Σύνθεση: Βρώμη 7,5%, Μαργαρίνη 4%, Γάλα 28,8%, Καλαμποκάλευρο 7,2%, Τυρί 14,4%, Αυγό 3,5%, Αλεύρι ολικής 34,6%

Θρεπτική αξία ανά 100 gr τροφής

| Ενέργεια            | Υδατάνθρακες | Πρωτεΐνες | Λίπη   |
|---------------------|--------------|-----------|--------|
| 208,2 θερμίδες Kcal | 23,5 gr      | 9,7 gr    | 8,3 gr |

Μέταλλα

| Ca mg | P mg  | Fe mg | Na mg | K mg  | Mg mg |
|-------|-------|-------|-------|-------|-------|
| 191,2 | 207,5 | 1,2   | 302,3 | 182,4 | 47,4  |

Βιταμίνες

| A IU | B1 mg | B2 mg | B3 mg | B6 mg | B9 μg | B12 μg | C mg | D IU | E mg |
|------|-------|-------|-------|-------|-------|--------|------|------|------|
| 296  | 0,2   | 0,2   | 1,1   | 0,1   | 13,1  | 25,0   | 0,3  | 5,2  | 0,3  |

1<sup>ο</sup> ΕΠΑΛ Διδυμοτείου «Ευγένιος Ευγενίδης»

**Σπιτικά γατοκεφτεδάκια**

BAKED | 100% φυσικά προϊόντα  
FRESH | υποαλλεργικό γεύμα

Ημερομηνία παραγωγής: Καθαρό βάρος:

Το προϊόν διατηρείται για επτά (7) ημέρες στο ψυγείο από την ημερομηνία παραγωγής. Καταναλώνεται εντός τριών (3) ημερών από το άνοιγμα της συσκευασίας.

**Σπιτικά γατοκεφτεδάκια**

Σύνθεση: Συκωτάκια 69,97%, Αυγό 11,3%, Αρακάς 11,5%, Μήλο 7,3%

Θρεπτική αξία ανά 100 gr τροφής

| Ενέργεια            | Υδατάνθρακες | Πρωτεΐνες | Λίπη   |
|---------------------|--------------|-----------|--------|
| 156,9 θερμίδες Kcal | 5,0 gr       | 16,7 gr   | 3,3 gr |

Μέταλλα

| Ca mg | P mg  | Fe mg | Na mg | K mg  | Mg mg |
|-------|-------|-------|-------|-------|-------|
| 16,6  | 281,6 | 7,5   | 50,4  | 313,2 | 5,4   |

Βιταμίνες

| A IU    | B1 mg | B2 mg | B3 mg | B6 mg | B9 μg | B12 μg | C mg | D IU | E mg |
|---------|-------|-------|-------|-------|-------|--------|------|------|------|
| 14206,7 | 0,1   | 0,1   | 11,5  | 0     | 7,8   | 59,7   | 3,1  | 7,9  | 0,9  |

1<sup>ο</sup> ΕΠΑΛ Διδυμοτείου «Ευγένιος Ευγενίδης»

**Πέλετ για κουνέλια**

BAKED | 100% φυσικά προϊόντα  
FRESH | υποαλλεργικό σνακ

Ημερομηνία παραγωγής: Καθαρό βάρος:

Το προϊόν διατηρείται για επτά (7) ημέρες στο ψυγείο από την ημερομηνία παραγωγής. Καταναλώνεται εντός τριών (3) ημερών από το άνοιγμα της συσκευασίας. Καλύπτει το 25% των ημερήσιων διατροφικών αναγκών.

**Πέλετ για κουνέλια**

Σύνθεση: Μαρούλι 10%, Λάχανο 10%, Αγγούρι 8%, Βρώμη 24,9%, Σιτάρι 23,9%, Αρακάς 7%, Μήλο 7%, Καλαμπόκι 7%, Φασκόμηλο 0,5%

Θρεπτική αξία ανά 100 gr τροφής

| Ενέργεια            | Υδατάνθρακες | Πρωτεΐνες | Λίπη   |
|---------------------|--------------|-----------|--------|
| 189,3 θερμίδες Kcal | 36,6 gr      | 6,1 gr    | 2,8 gr |

Μέταλλα

| Ca mg | P mg  | Fe mg | Na mg | K mg  | Mg mg |
|-------|-------|-------|-------|-------|-------|
| 39,9  | 214,4 | 2,5   | 6,5   | 296,9 | 56,6  |

Βιταμίνες

| A IU  | B1 mg | B2 mg | B3 mg | B6 mg | B9 μg | B12 μg | C mg | D IU | E mg |
|-------|-------|-------|-------|-------|-------|--------|------|------|------|
| 173,9 | 0,4   | 0,1   | 4,1   | 0,2   | 50,5  | 0      | 9,4  | 0    | 2,1  |

1<sup>ο</sup> ΕΠΑΛ Διδυμοτείου «Ευγένιος Ευγενίδης»

**Τραχανάς πουλερικών**

BAKED | 100% φυσικά προϊόντα  
FRESH | υποαλλεργικό σνακ

Ημερομηνία παραγωγής: Καθαρό βάρος:

Το προϊόν διατηρείται για επτά (7) ημέρες στο ψυγείο από την ημερομηνία παραγωγής. Καταναλώνεται εντός τριών (3) ημερών από το άνοιγμα της συσκευασίας.

**Τραχανάς πουλερικών**

Σύνθεση: Καλαμποκάλευρο 11,1%, Λάχανο 18,5%, Σιτάρι 18,5%, Καρότο 18,5%, Ψωμί 11,1%, Γάλα 11,1%, Κελύφη αυγών 11,1%

Θρεπτική αξία ανά 100 gr τροφής

| Ενέργεια            | Υδατάνθρακες | Πρωτεΐνες | Λίπη   |
|---------------------|--------------|-----------|--------|
| 118,2 θερμίδες Kcal | 35,1 gr      | 4,0 gr    | 1,1 gr |

Μέταλλα

| Ca mg | P mg  | Fe mg | Na mg | K mg  | Mg mg |
|-------|-------|-------|-------|-------|-------|
| 47,8  | 131,7 | 1,3   | 77,3  | 241,3 | 51,9  |

Βιταμίνες

| A IU   | B1 mg | B2 mg | B3 mg | B6 mg | B9 μg | B12 μg | C mg | D IU | E mg |
|--------|-------|-------|-------|-------|-------|--------|------|------|------|
| 2139,4 | 0,2   | 0,1   | 3,2   | 0,1   | 25,1  | 9,4    | 10,3 | 0,6  | 1,1  |

1<sup>ο</sup> ΕΠΑΛ Διδυμοτείου «Ευγένιος Ευγενίδης»

Figure S8 Samples of products labels



Figure S9 presents the products of the enterprise and the composting bin Bokashi.

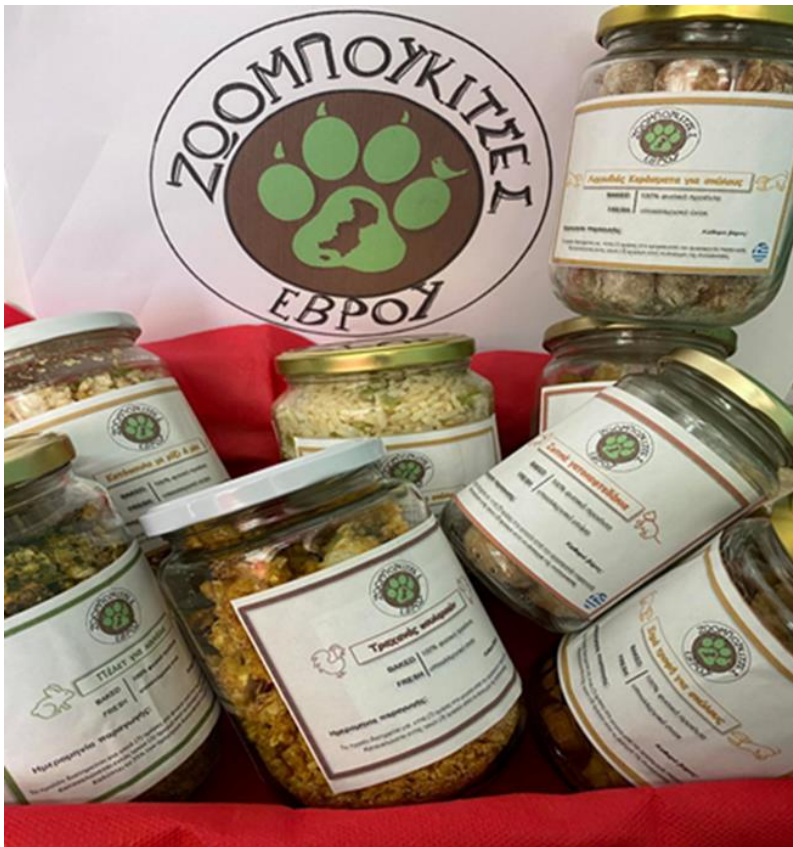

(a)

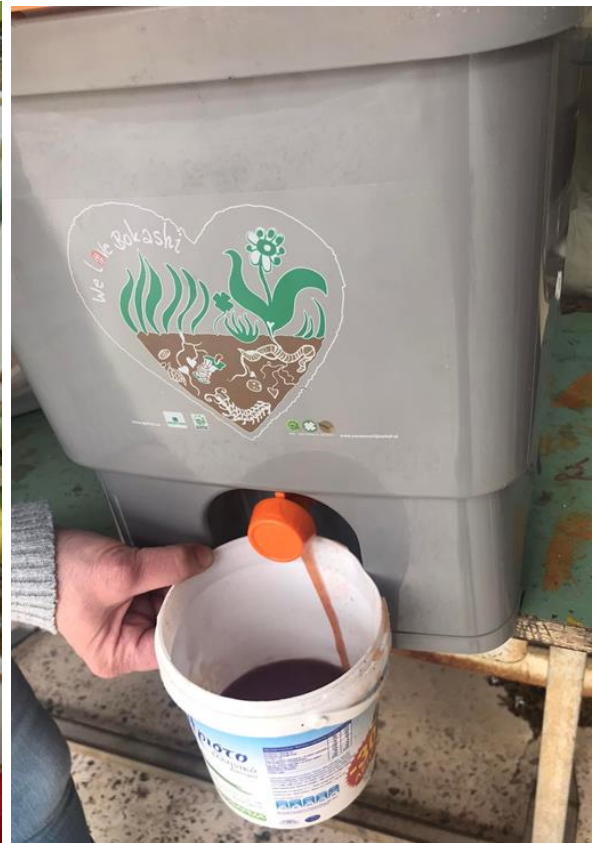

(b)

**Figure S9** The products (a) animal feed and (b) compost bin of Bokashi method

Figure S10 presents samples of videos for the promotion of the products.

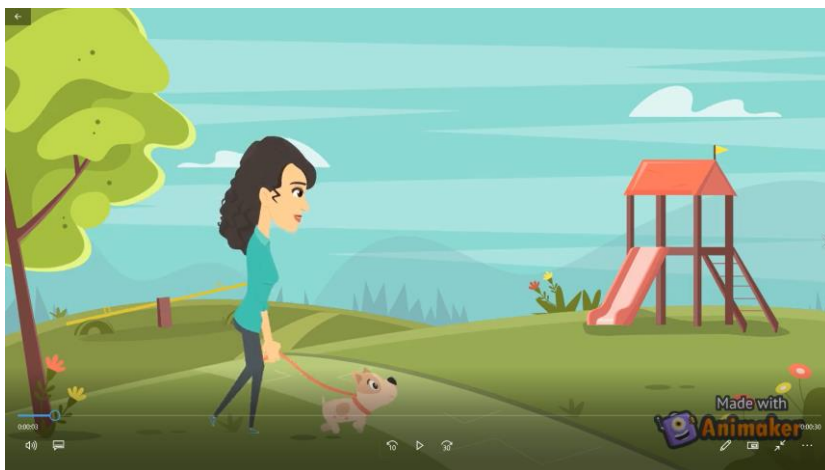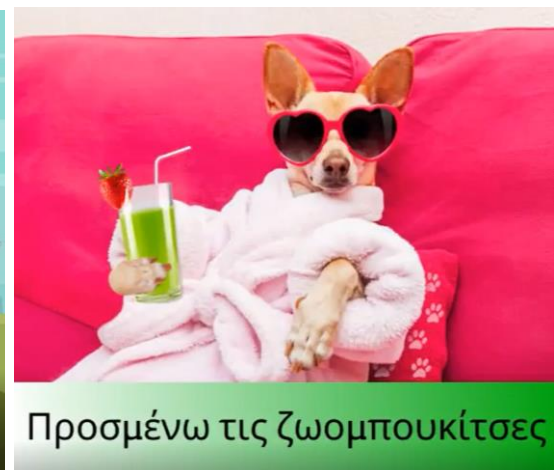

**Figure S10** Samples of promo videos for products
